# Supplementary material for: Feeding Ecology of Three Euphausiid Species in the North Pacific Ocean Inferred From 18S V9 Metabarcoding and Stable Isotope Analysis
Source: Frontiers journal article supplement (doi:10.3389/fmars.2021.756067), 2021-10-20
Supplement: Data_Sheet_1.docx [file Data_Sheet_1.docx]

Supplementary Material

**Supplementary Table 1**. Summary of PERMDISP and PERMANOVA analyses on the gut content composition of different euphausiid species. The value in bond indicates statistically significant differences between species.

|  | PERMDISP | | PERMANOVA | |
| --- | --- | --- | --- | --- |
| t | *p* | t | *p* |
| *E. hemigibba* × *E. pacifica*  *E. hemigibba* × *E. brevis*  *E. pacifica* × *E. brevis* | 1.701  1.566  0.567 | 0.155  0.147  0.586 | 1.017  2.235  1.355 | 0.375  **0.004**  0.126 |

**Supplementary Table 2.** Results of SIMPER analysis for the dissimilarity between the gut contents of *E. hemigibba* and *E. brevis* (cutoff for low contributions: 70%). Av. Abund: average abundance, Av. Diss: average dissimilarity, Diss/SD: dissimilarity over standard deviation of dissimilarity, Contrib%: contribution to the dissimilarity, Cum%: cumulative contribution to the dissimilarity. Bold text indicates supergroups mainly contributing to the dissimilarity (larger Diss/SD and Av. Diss).

|  | *E. hemigibba* | *E. brevis* | Average dissimilarity = 39.21 | | | |
| --- | --- | --- | --- | --- | --- | --- |
| Av. Abund | Av. Abund | Av. Diss | Diss/SD | Contrib (%) | Cum (%) |
| Hydrozoa | 2.15 | 4.16 | 7.63 | 1.11 | 19.47 | 19.47 |
| **Dinophyta** | 7.12 | 5.81 | **7.37** | **1.32** | 18.80 | 38.27 |
| Other Metazoa | 2.31 | 2.45 | 4.25 | 1.20 | 10.83 | 49.10 |
| **Rhizaria** | 0.67 | 1.98 | **4.02** | **1.25** | 10.25 | 59.35 |
| **Stramenopiles** | 3.13 | 2.55 | **4.00** | **1.34** | 10.20 | 69.56 |
